# Supplementary material
Source: Atypon-hosted journal article supplement (https://270.library.nashville.org/Record/CARL0000391526/DownloadSupplementalFile?fileId=68)
Supplement: DownloadSupplementalFile [file DownloadSupplementalFile]

**Historic Nashville, Inc. Records on Union Station  
1896-2000 (bulk 1971-2000)**

**Collection Summary**

**Creator:** Historic Nashville, Inc.

**Title:** Historic Nashville, Inc. Records on Union Station

**Inclusive Dates:** 1896-2000 (bulk 1971-2000)

**Summary/Abstract:** Records, consisting of manuscripts, photographs, negatives and architectural plans, documenting the efforts of Historic Nashville, Inc. (HNI) to rescue and restore Nashville's historic Union Station, beginning with their initial efforts in 1975 and culminating in the reopening of the building as a hotel, and the observation of the 100<sup>th</sup> anniversary of the station and the 25<sup>th</sup> anniversary of Historic Nashville, Inc. in 2000.

**Physical Description/Extent:** 2.74 cu. ft.

**Series:** Nine series:

- I. Save Our Station (SOS)
- II. Historic Nashville, Inc. vs. General Services Administration (HNI v. GSA)
- III. Unite to Save Union Station (USUS)
- IV. Mercury Statue & Train Shed
- V. Union Station Centennial & HNI 25<sup>th</sup> Anniversary
- VI. News Clippings & Research
- VII. Photographs
- VIII. Negatives
- IX. Building Plans

**Linking Entry Complexity Note:**

**Accession Number:** Acc. 2003.080

**Language:** English

**Stack Location:** West storage, Range 3, Section 2

Map Room, Shelf 12

SCC Miscellaneous Audio/Visual Box 2

**Repository:** Special Collections Division, Nashville Public Library, 615 Church Street, Nashville, TN 37219

**Chronology**

- 1898      Ground broken to build Union Station (Aug. 1)
- 1900      Union Station dedicated (Oct. 9)
- 1952      Mercury statue atop the station plummets to the ground and is destroyed.  
(Mar. 22)
- 1968      Historic Sites Federation of Tennessee formed.
- 1969      Union Station placed on the National Register of Historic Places
- 1974      Historic Nashville Inc. (HNI) becomes the new name of the Historic Sites Federation of Tennessee.

- 1975 Union Station is closed; conditions violate Metro codes. Two news articles in the *Tennessean Magazine* by Louise Davis (Feb. 9 and Mar. 16) bring attention to the condition of Union Station, and inspire efforts to save and restore the building. HNI hosts "Save Our Station" (S.O.S.) workshop on May 3 and launches campaign. Union Station and Train Shed declared a National Historic Landmark.
- 1976-77 The Junior League of Nashville sponsors an oral history project about Union Station. The project is led by Fletch Coke.
- 1977 *Speaking of Union Station* book is released as a joint effort of Historic Nashville, Inc. and the Junior League with proceeds going to the Union Station Trust Fund. The book is based upon oral histories conducted over the previous two years by the Junior League.
- 1978 Fletch Coke testifies before the Senate Committee on Environment and Public Works, advocating for the restoration of Union Station (June 21); General Services Administration receives funds to renovate the station; the L&N Railroad turns the station over to GSA.
- 1979 Last passenger train leaves Union Station.
- 1982 Mayor Richard Fulton asks GSA to give station to the city, as GSA activity has stalled. Fulton creates a Union Station Task Force.
- 1982 "Unite to Save Union Station" (USUS) effort launched by HNI.
- 1983 Union Station Joint Venture Inc. established. Elkington and Keltner Development sign on as developers for the property.
- 1982-84 HNI brings suit against the GSA for its neglect of the property. HNI wins.
- 1985 Gulf Coast Development takes the lead on development efforts. City of Nashville leases the station to Gulf Coast Development for ninety years. The train shed is not part of the package, and continues under ownership of L&N.
- 1985 Federal Department of Housing and Urban Development (HUD) approves funding for an Urban Development Action Grant (UDAG) to restore Union Station.
- 1986 Restoration work begins in earnest. In December, Union Station reopens as a hotel, although it is incomplete and restoration work continues.
- 1987 HNI produces film, *Union Station: Beacon for a New Century*
- 1988 Hotel at Union Station closes due to financial problems
- 1990 Hotel, under new ownership, reopens.
- 1996 Fire affects portion of hotel and Train Shed
- 1997 Mercury statue replaced atop Union Station tower
- 2000 HNI celebrates its 20<sup>th</sup> anniversary; Union Station celebrates 100 years
- 2001 Train Shed demolished due to deterioration
- 2003 National Historic Landmark status revoked due to demolition of Train Shed

### **Biographical/Historical Sketch**

In 1968 the Historic Sites Federation of Tennessee was formed. The name was changed to Historic Nashville, Inc. in 1974. Historic Nashville, Inc. was organized as a 501(c)(3) non-profit organization with a stated purpose to document and preserve the cultural, historical, and architectural heritage of Nashville. This group was instrumental in saving

Union Station, the Ryman Auditorium, and many other historic buildings. For many years, they held an annual Market Street Festival to raise awareness of the historic nature of downtown's Second Avenue. In 2003, their records were donated to the Special Collections Division of the Nashville Public Library.

Union Station opened on October 9, 1900 to serve as Nashville's main passenger and freight terminal for the Louisville and Nashville (L&N) Railroad and the Nashville and Chattanooga (N&C) Railroad (later the Nashville, Chattanooga, and St. Louis, or N.C. & St. L.). It served Nashville's transportation needs until the 1950s, when rail travel began to be superseded by the automobile and aviation, but portions of it remained in service as a passenger terminal until 1979. By the time passenger service ceased, the station had already fallen into grave disrepair, and was shut down for code violations in 1975. The building had been placed on the National Register of Historic Places in 1969, and received National Historic Landmark status in 1975, but this status was revoked in 2003 due to the demolition of the historic Train Shed in 2001. In 1978, the General Services Administration (GSA) of the U.S. government received funds to renovate the station, and the L&N Railroad turned over the station to the GSA. Subsequently, the City of Nashville took ownership of the property and in 1985 leased the property to Gulf Coast Development for 90 years. Also that year, the Federal Department of Housing and Urban Development approved an Urban Development Action Grant (UDAG) to fund restoration work on the station, and work soon began. On December 31, 1986, Union Station reopened as a hotel, although some restoration work was still ongoing. In 1997 the Mercury statue was replaced on top of the building, after the original had plummeted to the ground in 1952.

The efforts of Historic Nashville, Inc. (HNI) were instrumental in the salvation and restoration of this important structure. In 1975, they hosted a "Save Our Station" (S.O.S.) workshop, featuring national speakers, and launched a campaign to bring attention to the building's historic significance and to advocate for its restoration. In the two years following, the Junior League undertook a major oral history project, resulting in the publication (with HNI) of *Speaking of Union Station*, a book based on the oral histories, and sold with the proceeds going to the Union Station Trust Fund. In the early 1980s, HNI successfully sued the General Services Administration complaining that the GSA was not fulfilling its stated responsibility to prevent further deterioration of the station and renovate it. In 1982, HNI launched another campaign, "Unite to Save Union Station" or U.S.U.S. to advocate for the preservation and restoration of the station. In 1987, HNI produced a short documentary film, entitled, *Union Station: Beacon for a New Century*. On Dec. 31, 2000, a gala was held at the Union Station Hotel to celebrate the centennial of Union Station and the 25<sup>th</sup> anniversary of Historic Nashville, Inc.

### **Scope and Contents of the Collection**

This collection documents the efforts of Historic Nashville, Inc. (HNI) to rescue and restore Nashville's historic Union Station. Earliest records document the "Save Our Station" (S.O.S.) campaign in 1975, the first effort launched by HNI to advocate for the

restoration of the station. The lawsuit brought by HNI against the General Services Administration of the U.S. government in the early 1980s is well-documented in the collection, and includes significant information about the deteriorated condition of the building, especially water damage from holes in the roof, and roosting pigeons and their droppings, which presented a major health hazard and required expensive and prolonged mitigation efforts. Continuing efforts of HNI from about 1982 to about 1987 to rescue the station, including a campaign known as Unite to Save Union Station or USUS, are also well-documented, and include the film, *Union Station: Beacon for a New Century* and related materials. Additional materials document activities in 1986 to create a new Mercury statue to top the station, and efforts related to the preservation and restoration of the Train Shed in the mid-1980s. Materials also document in detail the centennial celebration of Union Station in 2000, in conjunction with the observance of Historic Nashville, Inc.'s 25-year anniversary. Additional materials in the collection are newspaper clippings about all of the above, and some scattered research files. Forty-seven photographs show both interior and exterior scenes of the deterioration of the station, primarily in black and white, and its resurrection as a grand hotel consisting mostly of interior scenes in color. Some black and white images also include the Hermitage [Hotel?] [HNI?] Award Banquet in 1984. Fourteen sheets of negatives primarily document the same banquet or other HNI meetings, though a few images are of other related subjects. Reproductions of building plans also form part of the collection. Additional details are provided in the descriptions for each series, below.

### **Organization/Arrangement of Materials**

**Organization:** Nine series by subject or format.

**Arrangement:** Roughly chronological, where applicable.

### **Restrictions**

**Restrictions on Access:** In library use only. Available by appointment. Some documents contain personal information, and may be restricted from public access.

**Restrictions on Use and Reproduction:** Some items may have originated or be copies from other organizations or institutions, and may not be able to be reproduced or photocopied. Such items are so noted within the collection and/or on the finding aid. Researchers are prohibited from disclosing or making any use of any personal contact information contained within the collection until 30 years have passed since the document's creation. No photocopies may be made of original or sheet music. Researchers are encouraged to consult photographs before requesting negatives. Researchers are encouraged to use mounted drawings of building plans first; access to rolled drawings will be considered only if the view or information needed is not provided on the mounted reproductions. Rolled drawings are very fragile and unwieldy, require special access assistance, and may not be photocopied. Rolled drawings are extremely light sensitive and must

not be exposed to intense or prolonged light. No duplication of videotapes due to copyright.

## **Index Terms**

### **Personal Names:**

Coke, Fletch  
Fulton, Richard Harmon, 1927-  
Mason, Debbie Dale  
Thornton, Lee Ann  
Tuke, Bob, (Robert Dudley)

### **Corporate Names/Organizations:**

CSX Transportation (Firm)  
Elkington and Keltner Development  
Farris, Warfield and Kanaday (Firm : Nashville, Tenn.)  
Gresham, Smith, and Partners  
Gulf Coast Development  
Historic Nashville, Inc.  
Historical Commission of Metropolitan Nashville-Davidson County  
Jack Daniel Foundation  
Junior League of Nashville  
Louisville and Nashville Railroad Company  
National Trust for Historic Preservation in the United States  
Save Our Station (Nashville, Tenn.)  
Union Station (Nashville, Tenn.)  
Union Station Hotel (Nashville, Tenn.)  
Union Station Trust Fund (Nashville, Tenn.)  
Unite to Save Union Station (Nashville, Tenn.)  
United States. Dept. of Housing and Urban Development  
United States. General Services Administration  
Urban Development Action Grant Program (U.S.)

### **Subjects:**

Architecture—Conservation and restoration—Tennessee—Nashville  
Architecture—Tennessee—Nashville  
Bird pests—Control—Tennessee—Nashville  
Buildings—Deterioration—Tennessee—Nashville  
Buildings—Remodeling for other use—Tennessee—Nashville  
Buildings—Repair and reconstruction—Tennessee—Nashville  
Buildings—Tennessee—Nashville  
Central business districts—Tennessee—Nashville  
Cities and towns—Growth—History—20<sup>th</sup> century  
Citizen suits (Civil procedure)—Tennessee—Nashville  
Commercial buildings—Tennessee—Nashville  
Hazard mitigation—Tennessee—Nashville

Historic buildings—Conservation and restoration—Tennessee—Nashville  
Historic hotels—Tennessee—Nashville  
Historic preservation—Economic aspects  
Historic preservation—Law and legislation—United States  
Historic preservation—Planning  
Historic preservation—Political aspects  
Historic preservation—Societies, etc.  
Historic preservation—Tennessee—Nashville  
History—Societies, etc.—Tennessee—Nashville  
Hotels—Tennessee—Nashville  
Mercury (Roman deity) —Statues  
Pigeons—Control—Tennessee—Nashville  
Railroad stations—Remodeling for other use—Tennessee—Nashville  
Railroad stations—Tennessee—Nashville

**Places:**

Nashville (Tenn.)—Buildings, structures, etc.  
Nashville (Tenn.)—History—20<sup>th</sup> century—Sources  
Nashville (Tenn.)—Economic conditions—20<sup>th</sup> century  
Nashville and Davidson County (Tenn.)  
Tennessee—History—20<sup>th</sup> century—Sources

**Genre/Document Types:**

Black-and-white photographs  
Building plans  
Color photographs  
Manuscripts (document genre)  
Negatives (photographic)  
Photographs  
Videotapes

**Occupations:**

Architects  
Contractors  
Historians  
Legislators  
Politicians  
Public officers

**Added Author (corporate):**

Save Our Station (Nashville, Tenn.)  
Unite to Save Union Station (Nashville, Tenn.)

**Added Title:**

Union Station: Beacon for a New Century

### **Associated and Related Material**

The Union Station Oral History Project is in the holdings of the Special Collections Division, Nashville Public Library.

Additional Historic Nashville, Inc. collections are in the holdings of the Special Collections Division, Nashville Public Library.

A brief account of the alligator pools at Union Station in the early twentieth century can be found in the manuscript collection: *Some Tidbits of Nashville History* by Paul H. Beasley, held by the Nashville Public Library.

Several artistic works picturing Union Station are included in the Nashville Room Oversize Collection.

### **Separated Material**

VHS videotape of the film, *Union Station: Beacon for a New Century* and a 3-minute "B-roll" from WTVF are housed in SCC, Miscellaneous Audio/Visual Box 2.

Oversize rolled plans are located in Map Room, Shelf 12

### **Administrative Information**

**Copyright:** Historic Nashville, Inc. transferred any copyright they held in these materials to the Public Library Board at time of donation. However, there may be some items for which they did not hold copyright, and therefore rights were not transferred to the Nashville Public Library. Portions of this collection, including sheet music, videotapes, and possibly other items, may be protected by copyright law (Title 17 U.S. Code).

**Preferred Citation:** Historic Nashville, Inc. Records on Union Station, Special Collections Division, Nashville Public Library.

**Immediate Source of Acquisition:** Donated by Historic Nashville Inc. by contract through the Public Library Board, Nov. 5, 2003.

**Ownership and Custodial History:** Materials in possession of Historic Nashville, Inc. until donated to the library in 2003.

**Processing Information:** Linda Barnickel, staff member, 2011-2012.

**Accruals:** No further accruals are expected.

### **References to Works by or about Collection Creator/Topic**

Cooney, Deborah, ed. *Speaking of Union Station: An Oral History* (Nashville: Williams Printing Co., 1977).

Sherman, Joe. *A Thousand Voices: The Story of Nashville's Union Station* (Nashville: Rutledge Hill Press, 1987).

### **Detailed Description of the Collection**

#### **Series I. Save Our Station (SOS), 1971-1983 (bulk 1971-1975), .2 cu. ft.**

**Series Abstract/Description:** Documents the initial efforts of Historic Nashville, Inc. and the Nashville community at large to save the deteriorating Union Station and to

have it listed as a National Historic Landmark. Includes correspondence, publicity materials, information about a workshop and actions of a task force.

**Arrangement:** Roughly chronological

**Container List:**

| <u>Box</u> | <u>Folder</u> |                                                       |
|------------|---------------|-------------------------------------------------------|
| 1          | 1             | Meeting on July 9, 1971 at State Capitol              |
| 1          | 2             | Misc. documents, 1973-74                              |
| 1          | 3             | Save Our Station Correspondence, 1975                 |
| 1          | 4             | Save Our Station Correspondence, 1975                 |
| 1          | 5             | Save Our Station Workshop – Publicity Materials, 1975 |
| 1          | 6             | Save Our Station Workshop – Treasurer’s Report, 1975  |
| 1          | 7             | Save Our Station Reservations, 1975                   |
| 1          | 8             | Correspondence from Volunteers, 1975                  |
| 1          | 9             | Union Station Task Force, 1975-76, 1983               |
| 1          | 10            | National Historic Landmark, 1976                      |

**Series II. Historic Nashville, Inc. v. General Services Administration (HNI v. GSA), 1978-1985, .2 cu. ft.**

**Series Abstract/Description:** Documents the efforts of Historic Nashville, Inc. to show that the General Services Administration of the United States Government failed in its legal obligation to care for the property of Union Station, and the subsequent lawsuit brought by HNI against the GSA, in which the courts found in favor of HNI. Due to the nature of the suit, there is considerable documentation about the state of disrepair which the station had fallen into, as well as biological and environmental hazards. This series also includes testimony from government officials, architects, specialists in environmental hazards and mitigation, and members of HNI. HNI was represented in the case by member and attorney Robert D. “Bob” Tuke.

**Arrangement:** Roughly chronological

**Container List:**

| <u>Box</u> | <u>Folder</u> |                                                               |
|------------|---------------|---------------------------------------------------------------|
| 1          | 11            | Prospectus for Alterations, 1978                              |
| 1          | 12            | Architectural Competition, 1978                               |
| 1          | 13            | Copy of Deed from GSA to L&N Railroad, 1979                   |
| 1          | 14            | GSA Report, 1982                                              |
| 1          | 15            | HNI vs. GSA lawsuit documents, 1983-1984                      |
| 1          | 16            | Correspondence concerning GSA, 1982-1985                      |
| 1          | 17            | Correspondence concerning GSA incl. lawsuit, 1982-1983        |
| 1          | 18            | Supplement to Final Environmental Impact Statement, 1983-1984 |

**Series III. Unite to Save Union Station (USUS), 1980-1987, .2 cu. ft.**

**Series Abstract/Description:** HNI launched the Unite to Save Union Station (USUS) campaign in 1982, to urge the General Services Administration of the United States government to fulfill its commitment to renovation – or at least, preventing further deterioration of, Union Station. HNI urged its membership and Nashville citizens to write congressional representatives and government officials, and began a petition



drive to show public support for the preservation and restoration of Union Station. In 1987, HNI produced a 30-minute documentary film, entitled *Union Station: Beacon for a New Century*, detailing the history and restoration of the station.

**Arrangement:** Roughly chronological

**Container List:**

| Box | Folder |                                         |
|-----|--------|-----------------------------------------|
| 1   | 19     | Correspondence, 1980-1986               |
| 1   | 20     | USUS Correspondence, 1982-1983          |
| 1   | 21     | USUS Campaign, 1982-1983                |
| 1   | 22     | HNI Membership Drive, ca. 1983          |
| 1   | 23     | USUS Certificates of Appreciation, 1983 |
| 1   | 24     | Press Releases, 1982-1987               |
| 1   | 25     | Union Station Run, 1985                 |
| 1   | 26     | Unidentified HNI ticket list, 1987      |
| 1   | 27     | Union Station film correspondence, 1987 |

SCC Misc. A/V Box 2 -- (2 VHS videotapes):

Union Station - "B-Roll," WTVF, ca. 1986, approx. 3 min.

No narration. Contains live, on-site sound. Scenes of train shed, construction, masons at work, open and boarded windows, interior splendor restoration, in progress. *Restriction: No duplication due to copyright.*

*Union Station: Beacon for a New Century*, WDCN, 1987, 30 min.

Tells the story of the creation, significance, decay, and restoration of Union Station. Includes photographs of original construction; recollection of opening day (Oct. 9, 1900) by 97-year-old Kate Jackson; photographs and descriptions of interior; Mercury statue; deterioration of the station in the 1970s; historic preservation activities by Historic Nashville, Inc. among others; various plans proposed for reuse of historic building; restoration activities including stained glass, woodwork, plaster work; and reopening on Dec. 15, 1986. Includes interviews with: Col. Phil Hooper, former vice president of the L&N Railroad; Custis L. Stamp and Mary Wilson, former Union Station employees; Louise Davis, reporter for the *Tennessean*; Jimmy Dillon; Dillon Millery; and Dennis Harmon of Emmanuel Stained Glass Studio. Credits: Frank Howard, executive producer; Fred Ellis, producer; Frank Howard, Knox Parks, and Stephen Salonsky, writers; Dan Chandler, narrator; David Halliburton, chief photographer; Jeffrey Steinberg, music; copyright 1987 by Gulf Coast Development, Inc. *Restriction: No duplication due to copyright.*

**Series IV. Mercury Statue & Train Shed, 1983-2000 (bulk 1983-1986), .2 cu. ft.**

**Series Abstract/Description:** Documents the efforts to recreate the Mercury statue which once topped the tower of Union Station; action by the Metropolitan Development and Housing Agency (MDHA) to obtain an Urban Development Action

Grant (UDAG) to restore and reuse Union Station; and efforts to restore the Train Shed, a National Historic Landmark.

**Arrangement:** By subject, then roughly chronological

**Container List:**

| Box | Folder |                                                                                                                                        |
|-----|--------|----------------------------------------------------------------------------------------------------------------------------------------|
| 1   | 28     | Mercury Statue – Sculptors, 1983-1984                                                                                                  |
| 1   | 29     | Mercury Statue – Jack Daniel Foundation, 1985-1986                                                                                     |
| 2   | 1      | Mercury Statue – Jack Daniel Foundation, 1986 (oversize)                                                                               |
| 1   | 30     | Mercury Statue – Notes, 1986                                                                                                           |
| 2   | 2      | Poster advertising “Union Station Revisited” calendar, 1980 (oversize)                                                                 |
| 2   | 3      | “Union Station Revisited,” calendar, featuring photographs by John Netherton (a fundraiser to restore Mercury Statue), 1980 (oversize) |
| 1   | 31     | Correspondence – Architects, 1984                                                                                                      |
| 1   | 32     | Urban Development Action Grant (UDAG), 1984                                                                                            |
| 1   | 33     | Train Shed, 1979, 1984                                                                                                                 |
| 1   | 34     | Correspondence to Congress about Train Shed, 1986                                                                                      |
| 1   | 35     | Train Shed Rehab Plan – Phase I (Gresham, Smith & Partners), 1993                                                                      |

**Series V. Union Station Centennial & Historic Nashville, Inc. 25<sup>th</sup> Anniversary, 1983-2000 (bulk 2000), .2 cu. ft.**

**Series Abstract/Description:** A variety of documents concerning planning and events associated with the centennial celebration of Union Station and observed at the same time, the 25<sup>th</sup> anniversary of Historic Nashville, Inc.

**Arrangement:** No formal arrangement scheme.

**Container List:**

| Box | Folder |                                                                                                                                             |
|-----|--------|---------------------------------------------------------------------------------------------------------------------------------------------|
| 1   | 36     | HNI 25th Anniversary & Union Station Centennial Planning, 2000                                                                              |
| 1   | 37     | HNI 25th Anniversary & Union Station Centennial Press Releases, 2000                                                                        |
| 1   | 38     | HNI 25th Anniversary Annual Meeting Invitations & Artwork, 2000                                                                             |
| 1   | 39     | Centennial – News Clippings, 2000                                                                                                           |
| 2   | 4      | Centennial – News Clippings, 2000 (oversize)                                                                                                |
| 1   | 40     | HNI Membership Lists, 2000                                                                                                                  |
| 1   | 41     | Centennial – List of Former HNI Board Members; Event Volunteers, 2000                                                                       |
| 1   | 42     | HNI Business Meeting & Centennial Celebration Reports, 2000                                                                                 |
| 1   | 43     | Centennial Celebration – Educational Activities, 2000                                                                                       |
| 1   | 44     | Centennial – Power Point Presentation Script, 2000                                                                                          |
| 1   | 45     | Centennial – Walking Tour, 2000                                                                                                             |
| 1   | 46     | Centennial – Music, 2000                                                                                                                    |
| 1   | 47     | Centennial – Music, “Nashville, Lower Broad,” 1983, 1993<br><i>Restriction: No photocopies of anything in this folder due to copyright.</i> |
| 1   | 48     | Centennial – Hotel Cake Contests, 2000                                                                                                      |
| 1   | 49     | Union Station Commemorative Merchandise, 1998, 2000                                                                                         |
| 1   | 50     | Centennial – Hotel Gala & Dedication, 2000                                                                                                  |
| 1   | 51     | Exchange Club Presentation, 2000                                                                                                            |

- |   |    |                                   |
|---|----|-----------------------------------|
| 1 | 52 | Centennial – Photo Research, n.d. |
| 1 | 53 | Photo Research, n.d.              |

**Series VI. News Clippings and Research, 1971-1983 (bulk 1971-1975), .2 cu. ft.**

**Series Abstract/Description:** Newsclippings (in folders as originally found in collection) and research materials about Union Station, Historic Nashville, Inc., and efforts to preserve and restore Union Station.

**Arrangement:** By format.

**Container List:**

| Box | Folder |                                                                         |
|-----|--------|-------------------------------------------------------------------------|
| 1   | 54     | News Clippings, 1971-1986                                               |
| 2   | 5      | News Clippings, 1974-1985 (oversize)                                    |
| 1   | 55     | News Clippings, 1975-1985                                               |
| 1   | 56     | News Clippings, 1973-2000                                               |
| 1   | 57     | Newsletters [various sources], 1978-1986                                |
| 1   | 58     | Historical Research Materials and Timelines, esp. Train Shed, 1933-2000 |
| 1   | 59     | Downtown Walking Tour, n.d.                                             |

**Series VII. Photographs, ca. 1984, ca. 2000, .2 cu. ft. (30 envelopes)**

**Series Abstract/Description:** 47 photographs, most black and white but some color prints, of Union Station in its deteriorated state (mostly black and white) and its completed restoration and reopening as a hotel (mostly in color). Photos include architectural details; the Train Shed; and interior and exterior views. Most images probably taken circa 1984 and circa 2000. Images also include the Hermitage [Hotel?] Award Banquet in 1984, featuring a Union Station theme and including some photographs of HNI members and honorees.

**Arrangement:** Roughly chronological.

**Container List:**

| Box 1 |         |                                                      |              |
|-------|---------|------------------------------------------------------|--------------|
| Envlp | Photo # | Subject                                              | Format       |
| 1-2   | 1-8     | Hermitage Award Banquet, 1984                        | B&W          |
| 3     | 9       | Brick building, "Alf's," n.d.                        | B&W          |
| 4-8   | 10-17   | Exterior views of deteriorated Union Station         | B&W          |
| 9-12  | 18-25   | Interior views of deteriorated Union Station         | B&W          |
| 13-16 | 26-33   | Unidentified Union Station/HNI events & people       | B&W          |
| 17-21 | 34-38   | Models of Union Station and railroad                 | Polaroid B&W |
| 22-28 | 29-45   | Interior of Union Station Hotel                      | Color; B&W   |
| 29-30 | 46-47   | Exterior of restored and cleaned Union Station/Hotel | Color        |

**Series VIII. Negatives, 1982-1984, .1 cu. ft.**

**Series Abstract/Description:** 14 sheets of negatives of Union Station and Historic Nashville, Inc. events. Most are black and white 35mm but a variety of other formats are also included. Some contact sheets and shot sheets exist. It is not clear if the shot sheets match the negatives which precede them.

**Arrangement:** Roughly chronological.

**Container List:**

Box 4

| Sheet | Subject                                                                                                         | Format & Size             |
|-------|-----------------------------------------------------------------------------------------------------------------|---------------------------|
| 1     | "Union Station Party," ca. 1982                                                                                 | B&W, 4x5<br>(2 per sheet) |
| 2     | Copy photographs;<br>HNI Unite to Save Union Station (USUS) display, ca. 1982                                   | B&W, 35mm                 |
| 3     | HNI USUS display, ca. 1982                                                                                      | B&W, 35mm                 |
| 4     | HNI USUS display, ca. 1982                                                                                      | B&W, 35mm                 |
| 5     | 4 negatives of 3 unidentified men, n.d.                                                                         | Color, 120mm              |
| 6     | HNI membership meeting, Nov. 1982;<br>Union Station Press Conference, Dec. 1982<br>Photographer: Jacques Miller | B&W, 35mm                 |
| 7     | HNI membership meeting, Nov. 1982;<br>Union Station Press Conference, Dec. 1982<br>Photographer: Jacques Miller | B&W, 35mm                 |
| 8     | HNI membership meeting, Nov. 1982;<br>Union Station Press Conference, Dec. 1982<br>Photographer: Jacques Miller | B&W, 35mm                 |
| 9     | HNI membership meeting, Nov. 1982;<br>Union Station Press Conference, Dec. 1982<br>Photographer: Jacques Miller | B&W, 35mm                 |
| 10    | HNI membership meeting, Nov. 1982;<br>Union Station Press Conference, Dec. 1982<br>Photographer: Jacques Miller | B&W, 35mm                 |
| 11    | "Hermitage Award Banquet," May 1984<br>Photographer: Wright                                                     | B&W, 35mm                 |
| 12    | "Hermitage Award Banquet," May 1984<br>Photographer: Wright                                                     | B&W, 4x5                  |
| 13    | "Hermitage Award Banquet," May 1984<br>Photographer: Wright                                                     | B&W, 4x5                  |
| 14    | Union Station Train Shed, May 29, 1984                                                                          | B&W, 35mm                 |

**Series IX. Building Plans, 1896-1959, 1.64 cu. ft.**

**Series Abstract/Description:** Eight architectural drawings (reproductions) mounted on foamcore (probably used in an HNI exhibit or program) plus three bundles of rolled drawings. Most drawings date from 1896 or 1898, and many were retraced in 1959. **Restriction:** Researchers are encouraged to use mounted drawings first; access to rolled drawings will be considered only if the view or information needed is not provided on the mounted reproductions. Rolled drawings are very fragile and unwieldy, require special access assistance, and may not be photocopied. Rolled drawings are extremely light sensitive and must not be exposed to intense or prolonged light.

**Arrangement:** None.

**Container List:**

- Box 2            Plan 1: Longitudinal Section, 1898 (retraced 1959)  
                    Plan 2: First Floor Plan, 1896, rev. 1898 (retraced 1936)  
                    Plan 3: Second Floor Plan, 1896 (retraced 1959)
- Box 3            Plan 4: South Elevation, 1896, rev. 1898  
                    Plan 5: East Elevation, 1896, rev. 1898  
                    Plan 6: North Elevation, 1896, rev. 1898  
                    Plan 7: West Elevation, 1896, rev. 1898  
                    Plan 8: Transverse Section, 1896 (retraced 1959)
- Box 5  
(Map Room  
Shelf 12)        Three bundles of rolled plans, 1898 and rev. 1959
